# Supplementary material for: COVID-19 Incidence Among Sixth Through Twelfth Grade Students by Vaccination Status
Source: Oxford University Press journal article supplement (doi:10.1542/peds.2022-056230), 2022-02-22
Supplement: peds_2022056230supplementarydata.pdf [file peds_2022056230supplementarydata.pdf]

## Supplemental Materials

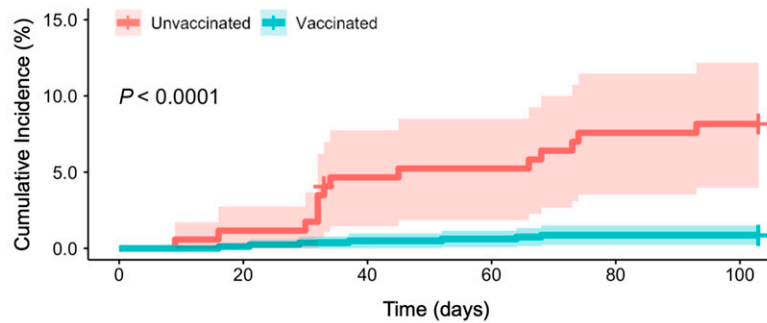

| No. at risk (no. of events) |                                                                  |
|-----------------------------|------------------------------------------------------------------|
| Unvaccinated                | 172 (0)    170 (2)    163 (8)    162 (9)    158 (13)    157 (14) |
| Vaccinated                  | 810 (0)    809 (1)    806 (4)    805 (5)    803 (7)    803 (7)   |

### SUPPLEMENTAL FIGURE 2

Sensitivity analysis of documented SARS-CoV-2 infection accounting for vaccine eligibility. Sensitivity analysis of cumulative incidence of documented SARS-CoV-2 infection among seventh to twelfth grade students, by vaccination status. Day 0 was August 1, 2021. Shaded areas indicate 95% confidence intervals. SARS-CoV-2, severe acute respiratory syndrome coronavirus 2.

**SUPPLEMENTAL TABLE 2** Characteristics of the Sixth to Twelfth Grade Study Population

| Characteristic                                 | Middle School Students <sup>a</sup> ( <i>n</i> = 465) | High School Students <sup>a</sup> ( <i>n</i> = 663) | All Students ( <i>n</i> = 1128) |
|------------------------------------------------|-------------------------------------------------------|-----------------------------------------------------|---------------------------------|
| Race or ethnicity, <sup>b</sup> <i>n</i> (%)   |                                                       |                                                     |                                 |
| Asian                                          | 61 (13.1)                                             | 56 (8.4)                                            | 117 (10.4)                      |
| Black                                          | 44 (9.5)                                              | 52 (7.8)                                            | 96 (8.5)                        |
| Did not report                                 | 38 (8.2)                                              | 57 (8.6)                                            | 100 (8.9)                       |
| Hispanic                                       | 19 (4.1)                                              | 21 (3.2)                                            | 40 (3.5)                        |
| International students                         | 0 (–)                                                 | 5 (0.8)                                             | 5 (0.4)                         |
| Middle Eastern                                 | 7 (1.5)                                               | <5 (0.6)                                            | 11 (1.0)                        |
| Multiracial                                    | 31 (6.7)                                              | 41 (6.2)                                            | 72 (6.4)                        |
| Native American                                | <5 (0.6)                                              | 5 (0.8)                                             | 8 (0.7)                         |
| Pacific Islander                               | <5 (0.4)                                              | 0 (–)                                               | <5 (0.2)                        |
| White                                          | 258 (55.5)                                            | 419 (63.2)                                          | 677 (60.0)                      |
| Sex, <i>n</i> (%)                              |                                                       |                                                     |                                 |
| Male                                           | 226 (48.6)                                            | 333 (50.2)                                          | 559 (49.6)                      |
| Female                                         | 239 (51.4)                                            | 329 (49.6)                                          | 568 (50.4)                      |
| Vaccination status, <i>n</i> (%)               |                                                       |                                                     |                                 |
| Vaccinated                                     | 264 (56.7)                                            | 565 (85.2)                                          | 829 (73.5)                      |
| Unvaccinated                                   | 201 (43.2)                                            | 98 (14.8)                                           | 299 (26.5)                      |
| COVID-19 infections, <i>n</i>                  |                                                       |                                                     |                                 |
| Primary <sup>c</sup>                           | 12                                                    | 13                                                  | 25                              |
| Secondary <sup>c</sup>                         | 1                                                     | 1                                                   | 2                               |
| School-related quarantines, <i>n</i>           | 1                                                     | 9                                                   | 10                              |
| COVID-19 tests reported, <sup>d</sup> <i>n</i> | 68                                                    | 144                                                 | 212                             |

COVID-19, coronavirus disease 2019; SARS-CoV-2, severe acute respiratory syndrome coronavirus 2.

<sup>a</sup> Middle school includes students in grades six to eight; high school is grades nine to 12.

<sup>b</sup> International students are exchange students who are not United States citizens.

<sup>c</sup> Primary infections are infections resulting from community exposure; secondary infections are infections resulting from within-school transmission.

<sup>d</sup> Includes all SARS-CoV-2 tests reported to the school nurses, including both tests done at the school or in the community, and tests done following exposure, due to symptoms, or before travel.

**SUPPLEMENTAL TABLE 3** Characteristics of the Seventh through Twelfth Grade Sensitivity Analysis Population

| Characteristic                             | Seventh-Eighth Grade Students <sup>a</sup> ( <i>n</i> = 319) | High School Students <sup>a</sup> ( <i>n</i> = 663) | Seventh to Twelfth Grade Students ( <i>n</i> = 982) |
|--------------------------------------------|--------------------------------------------------------------|-----------------------------------------------------|-----------------------------------------------------|
| Vaccination status, <i>n</i> (%)           |                                                              |                                                     |                                                     |
| Vaccinated                                 | 245 (76.8)                                                   | 565 (85.2)                                          | 810 (82.5)                                          |
| Unvaccinated                               | 74 (23.2)                                                    | 98 (14.8)                                           | 172 (17.5)                                          |
| COVID-19 infections, <sup>b</sup> <i>n</i> |                                                              |                                                     |                                                     |
| Primary                                    | 6                                                            | 13                                                  | 19                                                  |
| Secondary                                  | 1                                                            | 1                                                   | 2                                                   |
| School-related quarantines, <i>n</i>       | 1                                                            | 9                                                   | 10                                                  |

COVID-19, coronavirus disease 2019.

<sup>a</sup> High school includes grades 9 to 12.

<sup>b</sup> Primary infections are infections resulting from community exposure; secondary infections are infections resulting from within-school transmission.

**SUPPLEMENTAL TABLE 4** Sensitivity Analysis of SARS-CoV-2 Incidence and Vaccine Effectiveness Among Seventh through Twelfth Grade Students

|                                                | Number of Events | Total Person-Days at Risk | Incidence Rate per 1000 Person-Days | Incidence Rate Ratio (95% CI) | Vaccine Effectiveness,% (95% CI) |
|------------------------------------------------|------------------|---------------------------|-------------------------------------|-------------------------------|----------------------------------|
| Documented SARS-CoV-2 infections <sup>a</sup>  |                  |                           |                                     |                               |                                  |
| Unvaccinated                                   | 14               | 16 841                    | 0.831                               | 9.9 (4.0–24.2)                | 89.9 (74.9–95.1)                 |
| Vaccinated                                     | 7                | 82 996                    | 0.084                               | Reference                     |                                  |
| Symptomatic SARS-CoV-2 infections <sup>b</sup> |                  |                           |                                     |                               |                                  |
| Unvaccinated                                   | 11               | 16 841                    | 0.653                               | 10.8 (3.8–31.2)               | 90.8 (73.5–96.8)                 |
| Vaccinated                                     | 5                | 82 996                    | 0.060                               | Reference                     |                                  |

CI, confidence interval; SARS-CoV-2, severe acute respiratory syndrome coronavirus 2.

<sup>a</sup> Documented SARS-CoV-2 infection includes both symptomatic and asymptomatic infections.

<sup>b</sup> Students with asymptomatic SARS-CoV-2 infection were censored at time of infection.
